# Supplementary material
Source: MDPI journal article supplement (https://www.mdpi.com/2071-1050/15/17/12687)
Supplement: s1 [file s1]

## Supplementary Materials

### List of Investigated Unit Load Scenarios with Different Pallet Wood Species.

**Table S1.** Rank, UOR, and specification of investigated green high-density hardwood unit load scenarios for analysis. Scenarios selected at regular intervals and minimum required condition analysis are highlighted as yellow and green, respectively.

| Wood Species                | Rank | UOR   | Box weight decrease (kg) | Pallet weight increase (kg) | Initial top deck thickness (mm) | Increased top deck thickness (mm) | Initial board grade (kg/mm ECT) | Decreased board grade (kg/mm ECT) | Flute size | Box size |
|-----------------------------|------|-------|--------------------------|-----------------------------|---------------------------------|-----------------------------------|---------------------------------|-----------------------------------|------------|----------|
| Green High-Density Hardwood | 1    | 0.035 | 0.73                     | 20.86                       | 15.9                            | 31.8                              | 0.57                            | 0.52                              | C          | Small    |
|                             | 2    | 0.040 | 0.44                     | 10.88                       | 9.5                             | 17.5                              | 0.57                            | 0.52                              | C          | Large    |
|                             | 3    | 0.051 | 0.87                     | 17.23                       | 12.7                            | 25.4                              | 0.57                            | 0.52                              | C          | Medium   |
|                             | 4    | 0.114 | 0.73                     | 6.35                        | 12.7                            | 17.5                              | 0.57                            | 0.52                              | C          | Small    |
|                             | 5    | 0.137 | 0.87                     | 6.35                        | 9.5                             | 14.3                              | 0.57                            | 0.52                              | C          | Medium   |
|                             | 6    | 0.160 | 0.73                     | 4.54                        | 9.5                             | 12.7                              | 0.57                            | 0.52                              | C          | Small    |
|                             | 7    | 0.189 | 2.39                     | 12.70                       | 15.9                            | 25.4                              | 0.91                            | 0.86                              | BC         | Large    |
|                             | 8    | 0.211 | 3.63                     | 17.23                       | 19.1                            | 31.8                              | 0.91                            | 0.86                              | BC         | Small    |
|                             | 9    | 0.218 | 6.53                     | 29.93                       | 9.5                             | 31.7                              | 0.71                            | 0.57                              | C          | Medium   |
|                             | 10   | 0.264 | 2.39                     | 9.07                        | 9.5                             | 15.9                              | 0.91                            | 0.86                              | BC         | Large    |
|                             | 11   | 0.293 | 2.39                     | 8.16                        | 12.7                            | 19.1                              | 0.91                            | 0.86                              | BC         | Large    |
|                             | 12   | 0.320 | 2.61                     | 8.16                        | 15.9                            | 22.3                              | 0.91                            | 0.86                              | BC         | Medium   |
|                             | 13   | 0.328 | 5.66                     | 17.23                       | 12.7                            | 25.4                              | 0.79                            | 0.71                              | C          | Large    |
|                             | 14   | 0.446 | 5.66                     | 12.70                       | 9.5                             | 19                                | 0.79                            | 0.71                              | C          | Large    |
|                             | 15   | 0.576 | 2.61                     | 4.54                        | 9.5                             | 12.7                              | 0.91                            | 0.86                              | BC         | Medium   |
|                             | 16   | 0.576 | 2.61                     | 4.54                        | 12.7                            | 15.9                              | 0.91                            | 0.86                              | BC         | Medium   |
|                             | 17   | 0.600 | 6.53                     | 10.88                       | 12.7                            | 20.7                              | 0.79                            | 0.71                              | C          | Medium   |
|                             | 18   | 0.657 | 11.32                    | 17.23                       | 12.7                            | 25.4                              | 1.27                            | 1.09                              | BC         | Medium   |
|                             | 19   | 0.686 | 8.71                     | 12.70                       | 15.9                            | 25.4                              | 0.79                            | 0.71                              | C          | Small    |
|                             | 20   | 0.733 | 7.98                     | 10.88                       | 9.5                             | 17.5                              | 0.71                            | 0.57                              | C          | Small    |
|                             | 21   | 0.800 | 3.63                     | 4.54                        | 12.7                            | 15.9                              | 0.91                            | 0.86                              | BC         | Small    |
|                             | 22   | 0.800 | 20.32                    | 25.40                       | 12.7                            | 31.8                              | 1.09                            | 0.91                              | BC         | Small    |
|                             | 23   | 1.000 | 3.63                     | 3.63                        | 15.9                            | 19.1                              | 0.91                            | 0.86                              | BC         | Small    |
|                             | 24   | 1.240 | 13.50                    | 10.88                       | 9.5                             | 17.5                              | 1.09                            | 0.91                              | BC         | Medium   |
|                             | 25   | 1.248 | 11.32                    | 9.07                        | 9.5                             | 15.9                              | 1.27                            | 1.09                              | BC         | Medium   |
|                             | 26   | 1.267 | 13.79                    | 10.88                       | 12.7                            | 20.7                              | 1.27                            | 1.09                              | BC         | Small    |
|                             | 27   | 1.333 | 3.63                     | 2.72                        | 9.5                             | 11.1                              | 0.91                            | 0.86                              | BC         | Small    |
|                             | 28   | 1.371 | 8.71                     | 6.35                        | 12.7                            | 17.5                              | 0.79                            | 0.71                              | C          | Small    |

|    |       |       |      |     |      |      |      |    |        |
|----|-------|-------|------|-----|------|------|------|----|--------|
| 29 | 1.440 | 6.53  | 4.54 | 9.5 | 12.7 | 0.79 | 0.71 | C  | Medium |
| 30 | 1.920 | 8.71  | 4.54 | 9.5 | 12.7 | 0.79 | 0.71 | C  | Small  |
| 31 | 2.171 | 13.79 | 6.35 | 9.5 | 14.3 | 1.27 | 1.09 | BC | Small  |
| 32 | 3.200 | 20.32 | 6.35 | 9.5 | 14.3 | 1.09 | 0.91 | BC | Small  |

\*Note: Size of small box is 203.2 mm x 304.8 mm x 254 mm, medium box is 406.4 mm x 254 mm x 254 mm, and large box is 609.6 mm x 337.8 mm x 254 mm (Kim et al., 2021 [35]).

**Table S2.** Rank, UOR, and specification of investigated green low-density hardwood unit load scenarios for analysis. Scenarios selected at regular intervals and minimum required condition analysis are highlighted as yellow and green, respectively.

| Wood Species               | Rank | UOR   | Box weight    | Pallet weight | Initial top deck | Increased top       | Initial board     | Decreased               | Flute size | Box size |
|----------------------------|------|-------|---------------|---------------|------------------|---------------------|-------------------|-------------------------|------------|----------|
|                            |      |       | decrease (kg) | increase (kg) | thickness (mm)   | deck thickness (mm) | grade (kg/mm ECT) | board grade (kg/mm ECT) |            |          |
| Green Low-Density Hardwood | 1    | 0.021 | 0.44          | 20.86         | 12.7             | 31.8                | 0.57              | 0.52                    | C          | Large    |
|                            | 2    | 0.040 | 0.44          | 10.88         | 9.5              | 19                  | 0.57              | 0.52                    | C          | Large    |
|                            | 3    | 0.073 | 0.73          | 9.98          | 15.9             | 25.4                | 0.57              | 0.52                    | C          | Small    |
|                            | 4    | 0.096 | 0.87          | 9.07          | 12.7             | 20.7                | 0.57              | 0.52                    | C          | Medium   |
|                            | 5    | 0.133 | 0.73          | 5.44          | 12.7             | 17.5                | 0.57              | 0.52                    | C          | Small    |
|                            | 6    | 0.160 | 0.87          | 5.44          | 9.5              | 14.3                | 0.57              | 0.52                    | C          | Medium   |
|                            | 7    | 0.192 | 2.61          | 13.61         | 19.1             | 31.8                | 0.91              | 0.86                    | BC         | Medium   |
|                            | 8    | 0.200 | 0.73          | 3.63          | 9.5              | 12.7                | 0.57              | 0.52                    | C          | Small    |
|                            | 9    | 0.220 | 2.39          | 10.88         | 9.5              | 19                  | 0.91              | 0.86                    | BC         | Large    |
|                            | 10   | 0.240 | 2.39          | 9.98          | 15.9             | 25.4                | 0.91              | 0.86                    | BC         | Large    |
|                            | 11   | 0.267 | 6.53          | 24.49         | 9.5              | 31.7                | 0.71              | 0.57                    | C          | Medium   |
|                            | 12   | 0.330 | 2.39          | 7.26          | 12.7             | 19.1                | 0.91              | 0.86                    | BC         | Large    |
|                            | 13   | 0.416 | 5.66          | 13.61         | 12.7             | 25.4                | 0.79              | 0.71                    | C          | Large    |
|                            | 14   | 0.446 | 5.66          | 12.70         | 9.5              | 20.6                | 0.79              | 0.71                    | C          | Large    |
|                            | 15   | 0.480 | 2.61          | 5.44          | 15.9             | 20.7                | 0.91              | 0.86                    | BC         | Medium   |
|                            | 16   | 0.647 | 13.5          | 20.86         | 12.7             | 31.8                | 1.09              | 0.91                    | BC         | Medium   |
|                            | 17   | 0.720 | 2.61          | 3.63          | 9.5              | 12.7                | 0.91              | 0.86                    | BC         | Medium   |
|                            | 18   | 0.720 | 2.61          | 3.63          | 12.7             | 15.9                | 0.91              | 0.86                    | BC         | Medium   |
|                            | 19   | 0.900 | 6.53          | 7.26          | 12.7             | 19.1                | 0.79              | 0.71                    | C          | Medium   |
|                            | 20   | 1.000 | 3.63          | 3.63          | 15.9             | 19.1                | 0.91              | 0.86                    | BC         | Small    |
|                            | 21   | 1.000 | 3.63          | 3.63          | 19.1             | 22.3                | 0.91              | 0.86                    | BC         | Small    |
|                            | 22   | 1.040 | 11.32         | 10.88         | 12.7             | 22.2                | 1.27              | 1.09                    | BC         | Medium   |
|                            | 23   | 1.100 | 7.98          | 7.26          | 9.5              | 15.9                | 0.71              | 0.57                    | C          | Small    |
|                            | 24   | 1.200 | 8.71          | 7.26          | 15.9             | 22.3                | 0.79              | 0.71                    | C          | Small    |
|                            | 25   | 1.560 | 11.32         | 7.26          | 9.5              | 15.9                | 1.27              | 1.09                    | BC         | Medium   |

|    |       |       |      |      |      |      |      |    |        |
|----|-------|-------|------|------|------|------|------|----|--------|
| 26 | 1.800 | 6.53  | 3.63 | 9.5  | 12.7 | 0.79 | 0.71 | C  | Medium |
| 27 | 1.860 | 13.5  | 7.26 | 9.5  | 15.9 | 1.09 | 0.91 | BC | Medium |
| 28 | 1.900 | 13.79 | 7.26 | 12.7 | 19.1 | 1.27 | 1.09 | BC | Small  |
| 29 | 2.000 | 3.63  | 1.81 | 9.5  | 11.1 | 0.91 | 0.86 | BC | Small  |
| 30 | 2.000 | 3.63  | 1.81 | 12.7 | 14.3 | 0.91 | 0.86 | BC | Small  |
| 31 | 2.400 | 8.71  | 3.63 | 9.5  | 12.7 | 0.79 | 0.71 | C  | Small  |
| 32 | 2.400 | 8.71  | 3.63 | 12.7 | 15.9 | 0.79 | 0.71 | C  | Small  |
| 33 | 2.533 | 13.79 | 5.44 | 9.5  | 14.3 | 1.27 | 1.09 | BC | Small  |
| 34 | 2.800 | 20.32 | 7.26 | 12.7 | 19.1 | 1.09 | 0.91 | BC | Small  |
| 35 | 3.733 | 20.32 | 5.44 | 9.5  | 14.3 | 1.09 | 0.91 | BC | Small  |

\*Note: Size of small box is 203.2 mm x 304.8 mm x 254 mm, medium box is 406.4 mm x 254 mm x 254 mm, and large box is 609.6 mm x 337.8 mm x 254 mm (Kim et al., 2021 [35]).

**Table S3.** Rank, UOR, and specification of investigated green southern yellow pine unit load scenarios for analysis. Scenarios selected at regular intervals and minimum required condition analysis are highlighted as yellow and green, respectively.

| Wood Species               | Rank | UOR   | Box                  |                             | Initial top deck thickness (mm) | Increased top deck thickness (mm) | Initial board grade (kg/mm ECT) | Decreased board grade (kg/mm ECT) | Flute size | Box size |
|----------------------------|------|-------|----------------------|-----------------------------|---------------------------------|-----------------------------------|---------------------------------|-----------------------------------|------------|----------|
|                            |      |       | weight decrease (kg) | Pallet weight increase (kg) |                                 |                                   |                                 |                                   |            |          |
| Green Southern Yellow Pine | 1    | 0.023 | 0.44                 | 19.05                       | 12.7                            | 31.8                              | 0.57                            | 0.52                              | C          | Large    |
|                            | 2    | 0.048 | 0.44                 | 9.07                        | 9.5                             | 19                                | 0.57                            | 0.52                              | C          | Large    |
|                            | 3    | 0.107 | 0.87                 | 8.16                        | 12.7                            | 20.7                              | 0.57                            | 0.52                              | C          | Medium   |
|                            | 4    | 0.114 | 0.73                 | 6.35                        | 12.7                            | 19.1                              | 0.57                            | 0.52                              | C          | Small    |
|                            | 5    | 0.192 | 0.87                 | 4.54                        | 9.5                             | 14.3                              | 0.57                            | 0.52                              | C          | Medium   |
|                            | 6    | 0.206 | 2.61                 | 12.70                       | 19.1                            | 31.8                              | 0.91                            | 0.86                              | BC         | Medium   |
|                            | 7    | 0.240 | 2.39                 | 9.98                        | 15.9                            | 25.4                              | 0.91                            | 0.86                              | BC         | Large    |
|                            | 8    | 0.267 | 0.73                 | 2.72                        | 9.5                             | 12.7                              | 0.57                            | 0.52                              | C          | Small    |
|                            | 9    | 0.330 | 2.39                 | 7.26                        | 9.5                             | 17.5                              | 0.91                            | 0.86                              | BC         | Large    |
|                            | 10   | 0.377 | 2.39                 | 6.35                        | 12.7                            | 19.1                              | 0.91                            | 0.86                              | BC         | Large    |
|                            | 11   | 0.400 | 6.53                 | 16.33                       | 15.9                            | 31.8                              | 0.79                            | 0.71                              | C          | Medium   |
|                            | 12   | 0.446 | 5.66                 | 12.70                       | 12.7                            | 25.4                              | 0.79                            | 0.71                              | C          | Large    |
|                            | 13   | 0.480 | 2.61                 | 5.44                        | 15.9                            | 20.7                              | 0.91                            | 0.86                              | BC         | Medium   |
|                            | 14   | 0.520 | 5.66                 | 10.88                       | 9.5                             | 20.6                              | 0.79                            | 0.71                              | C          | Large    |
|                            | 15   | 0.554 | 6.53                 | 11.79                       | 9.5                             | 22.2                              | 0.71                            | 0.57                              | C          | Medium   |
|                            | 16   | 0.571 | 3.63                 | 6.35                        | 19.1                            | 25.5                              | 0.91                            | 0.86                              | BC         | Small    |
|                            | 17   | 0.709 | 13.5                 | 19.05                       | 12.7                            | 31.8                              | 1.09                            | 0.91                              | BC         | Medium   |
|                            | 18   | 0.844 | 13.79                | 16.33                       | 15.9                            | 31.8                              | 1.27                            | 1.09                              | BC         | Small    |
|                            | 19   | 0.873 | 8.71                 | 9.98                        | 15.9                            | 25.4                              | 0.79                            | 0.71                              | C          | Small    |

|    |       |       |      |      |      |      |      |    |        |
|----|-------|-------|------|------|------|------|------|----|--------|
| 20 | 0.960 | 2.61  | 2.72 | 12.7 | 15.9 | 0.91 | 0.86 | BC | Medium |
| 21 | 1.000 | 3.63  | 3.63 | 15.9 | 19.1 | 0.91 | 0.86 | BC | Small  |
| 22 | 1.100 | 7.98  | 7.26 | 9.5  | 17.5 | 0.71 | 0.57 | C  | Small  |
| 23 | 1.387 | 11.32 | 8.16 | 12.7 | 20.7 | 1.27 | 1.09 | BC | Medium |
| 24 | 1.440 | 6.53  | 4.54 | 12.7 | 17.5 | 0.79 | 0.71 | C  | Medium |
| 25 | 1.920 | 8.71  | 4.54 | 12.7 | 17.5 | 0.79 | 0.71 | C  | Small  |
| 26 | 2.000 | 3.63  | 1.81 | 12.7 | 14.3 | 0.91 | 0.86 | BC | Small  |
| 27 | 2.080 | 11.32 | 5.44 | 9.5  | 15.9 | 1.27 | 1.09 | BC | Medium |
| 28 | 2.171 | 13.79 | 6.35 | 12.7 | 19.1 | 1.27 | 1.09 | BC | Small  |
| 29 | 2.400 | 6.53  | 2.72 | 9.5  | 12.7 | 0.79 | 0.71 | C  | Medium |
| 30 | 2.480 | 13.5  | 5.44 | 9.5  | 15.9 | 1.09 | 0.91 | BC | Medium |
| 31 | 2.880 | 2.61  | 0.91 | 9.5  | 11.1 | 0.91 | 0.86 | BC | Medium |
| 32 | 3.040 | 13.79 | 4.54 | 9.5  | 14.3 | 1.27 | 1.09 | BC | Small  |
| 33 | 3.200 | 8.71  | 2.72 | 12.7 | 19.1 | 1.09 | 0.91 | BC | Small  |
| 34 | 3.200 | 20.32 | 6.35 | 9.5  | 12.7 | 0.79 | 0.71 | C  | Small  |
| 35 | 4.000 | 3.63  | 0.91 | 9.5  | 11.1 | 0.91 | 0.86 | BC | Small  |
| 36 | 4.480 | 20.32 | 4.54 | 9.5  | 14.3 | 1.09 | 0.91 | BC | Small  |

\*Note: Size of small box is 203.2 mm x 304.8 mm x 254 mm, medium box is 406.4 mm x 254 mm x 254 mm, and large box is 609.6 mm x 337.8 mm x 254 mm (Kim et al., 2021 [35]).

**Table S4.** Rank, UOR, and specification of investigated kiln-dried southern yellow pine unit load scenarios for analysis. Scenarios selected at regular intervals are highlighted.

| Wood Species                    | Rank | UOR   | Box                  |                             | Initial top deck thickness (mm) | Increased top deck thickness (mm) | Initial board grade (kg/mm ECT) | Decreased board grade (kg/mm ECT) | Flute size | Box size |
|---------------------------------|------|-------|----------------------|-----------------------------|---------------------------------|-----------------------------------|---------------------------------|-----------------------------------|------------|----------|
|                                 |      |       | weight decrease (kg) | Pallet weight increase (kg) |                                 |                                   |                                 |                                   |            |          |
| Kiln-dried Southern Yellow Pine | 1    | 0.16  | 0.73                 | 4.54                        | 11.1                            | 28.6                              | 0.57                            | 0.52                              | C          | Small    |
|                                 | 2    | 0.527 | 2.39                 | 4.54                        | 11.1                            | 28.6                              | 1.27                            | 1.09                              | BC         | Large    |
|                                 | 3    | 0.575 | 2.61                 | 4.54                        | 11.1                            | 28.6                              | 1.27                            | 1.09                              | BC         | Medium   |
|                                 | 4    | 0.799 | 3.63                 | 4.54                        | 11.1                            | 28.6                              | 1.27                            | 1.09                              | BC         | Small    |
|                                 | 5    | 1.918 | 8.71                 | 4.54                        | 11.1                            | 28.6                              | 0.79                            | 0.71                              | C          | Small    |

\*Note: Size of small box is 203.2 mm x 304.8 mm x 254 mm, medium box is 406.4 mm x 254 mm x 254 mm, and large box is 609.6 mm x 337.8 mm x 254 mm (Kim et al., 2021 [35]).

### Input and outputs for the raw material production of different wood species groups.

**Table S5.** Inputs and outputs for the raw material production of 1 kg of wooden pallet built with green high-density hardwood (modified from Alanya-Rosenbaum et al. [20]).

|                                                  | Unit  | Weighted average | Allocation (%) |
|--------------------------------------------------|-------|------------------|----------------|
| <b>Outputs: Products/Coproducts</b>              |       |                  |                |
| Wood board                                       | kg    | 1                | 82.3           |
| Sawdust                                          | kg    | 0.083            | 6.8            |
| Hogged material                                  | kg    | 0.052            | 4.3            |
| Wood chips                                       | kg    | 0.063            | 5.2            |
| Scrap wood                                       | kg    | 0.0006           | 0.05           |
| Shavings                                         | kg    | 0.016            | 1.35           |
| <b>Inputs: materials/fuels</b>                   |       |                  |                |
| Sawn lumber, softwood, rough, green, at sawmill, |       |                  |                |
| SE/m3/RNA                                        | m3    | 1.40E-03         |                |
| Greases                                          | g     | 1.78E+00         |                |
| Motor oil                                        | g     | 5.17E+00         |                |
| Hydraulic fluid                                  | g     | 1.08E+01         |                |
| Lubricating fluid                                | g     | 7.17E+00         |                |
| Plastic wrapping                                 | g     | 4.55E+00         |                |
| Cardboard packaging                              | g     | 3.42E+00         |                |
| Natural gas                                      | L     | 1.88E+02         |                |
| Diesel                                           | L     | 5.41E-01         |                |
| Gasoline                                         | L     | 5.50E-03         |                |
| Liquefied petroleum gas                          | L     | 2.48E-02         |                |
| Wood fuel                                        | OD kg | 1.40E-02         |                |
| Diesel, forklift                                 | L     | 1.67E-01         |                |
| Diesel, truck                                    | L     | 7.37E-02         |                |
| Gasoline, truck                                  | L     | 7.49E-04         |                |

|                                              |     |          |
|----------------------------------------------|-----|----------|
| Propane, forklift                            | L   | 5.31E-01 |
| <b>Inputs: electricity/heat</b>              |     |          |
| Electricity, at grid, SERC, 2010/kWh/RNA     | kWh | 0.002    |
| <b>Outputs: Waste/emissions to treatment</b> |     |          |
| Steel scrap                                  | g   | 2.99E+02 |
| Plastic wrap                                 | g   | 6.99E+00 |
| Cardboard packaging                          | g   | 7.60E+01 |
| Hydraulic fluid                              | g   | 1.14E+00 |
| Motor oil                                    | g   | 1.67E-01 |
| Greases                                      | g   | 3.04E-02 |
| Lubricants                                   | g   | 1.49E+01 |

**Table S6.** Inputs and outputs for the raw material production of 1 kg of wooden pallet built with green low-density hardwood (modified from Alanya-Rosenbaum et al. [20]).

|                                                  | Unit | Weighted average | Allocation (%) |
|--------------------------------------------------|------|------------------|----------------|
| <b>Outputs: Products/Coproducts</b>              |      |                  |                |
| Wood board                                       | kg   | 1                | 82.3           |
| Sawdust                                          | kg   | 0.083            | 6.8            |
| Hogged material                                  | kg   | 0.052            | 4.3            |
| Wood chips                                       | kg   | 0.063            | 5.2            |
| Scrap wood                                       | kg   | 0.0006           | 0.05           |
| Shavings                                         | kg   | 0.016            | 1.35           |
| <b>Inputs: materials/fuels</b>                   |      |                  |                |
| Sawn lumber, softwood, rough, green, at sawmill, |      |                  |                |
| SE/m3/RNA                                        | m3   | 1.70E-03         |                |
| Greases                                          | g    | 2.16E+00         |                |
| Motor oil                                        | g    | 6.28E+00         |                |
| Hydraulic fluid                                  | g    | 1.31E+01         |                |
| Lubricating fluid                                | g    | 8.71E+00         |                |

|                                              |       |          |
|----------------------------------------------|-------|----------|
| Plastic wrapping                             | g     | 5.52E+00 |
| Cardboard packaging                          | g     | 4.15E+00 |
| Natural gas                                  | L     | 2.29E+02 |
| Diesel                                       | L     | 6.57E-01 |
| Gasoline                                     | L     | 6.68E-03 |
| Liquefied petroleum gas                      | L     | 3.01E-02 |
| Wood fuel                                    | OD kg | 1.70E-02 |
| Diesel, forklift                             | L     | 2.03E-01 |
| Diesel, truck                                | L     | 8.95E-02 |
| Gasoline, truck                              | L     | 9.10E-04 |
| Propane, forklift                            | L     | 6.44E-01 |
| <b>Inputs: electricity/heat</b>              |       |          |
| Electricity, at grid, SERC, 2010/kWh/RNA     | kWh   | 0.003    |
| <b>Outputs: Waste/emissions to treatment</b> |       |          |
| Steel scrap                                  | g     | 3.63E+02 |
| Plastic wrap                                 | g     | 8.49E+00 |
| Cardboard packaging                          | g     | 9.23E+01 |
| Hydraulic fluid                              | g     | 1.38E+00 |
| Motor oil                                    | g     | 2.03E-01 |
| Greases                                      | g     | 3.69E-02 |
| Lubricants                                   | g     | 1.81E+01 |

**Table S7.** Inputs and outputs for the raw material production of 1 kg of wooden pallet built with green southern yellow pine (modified from Alanya-Rosenbaum et al. [20]).

|                                     | Unit | Weighted average | Allocation (%) |
|-------------------------------------|------|------------------|----------------|
| <b>Outputs: Products/Coproducts</b> |      |                  |                |
| Wood board                          | kg   | 1                | 82.3           |
| Sawdust                             | kg   | 0.083            | 6.8            |
| Hogged material                     | kg   | 0.052            | 4.3            |

|            |    |        |      |
|------------|----|--------|------|
| Wood chips | kg | 0.063  | 5.2  |
| Scrap wood | kg | 0.0006 | 0.05 |
| Shavings   | kg | 0.016  | 1.35 |

**Inputs: materials/fuels**

Sawn lumber, softwood, rough, green, at sawmill,

|                         |       |          |  |
|-------------------------|-------|----------|--|
| SE/m3/RNA               | m3    | 0.0019   |  |
| Greases                 | g     | 2.41E+00 |  |
| Motor oil               | g     | 7.01E+00 |  |
| Hydraulic fluid         | g     | 1.47E+01 |  |
| Lubricating fluid       | g     | 9.74E+00 |  |
| Plastic wrapping        | g     | 6.17E+00 |  |
| Cardboard packaging     | g     | 4.64E+00 |  |
| Natural gas             | L     | 2.56E+02 |  |
| Diesel                  | L     | 7.34E-01 |  |
| Gasoline                | L     | 7.47E-03 |  |
| Liquefied petroleum gas | L     | 3.36E-02 |  |
| Wood fuel               | OD kg | 1.90E-02 |  |
| Diesel, forklift        | L     | 2.27E-01 |  |
| Diesel, truck           | L     | 1.00E-01 |  |
| Gasoline, truck         | L     | 1.02E-03 |  |
| Propane, forklift       | L     | 7.20E-01 |  |

**Inputs: electricity/heat**

|                                          |     |       |  |
|------------------------------------------|-----|-------|--|
| Electricity, at grid, SERC, 2010/kWh/RNA | kWh | 0.003 |  |
|------------------------------------------|-----|-------|--|

**Outputs: Waste/emissions to treatment**

|                     |   |          |  |
|---------------------|---|----------|--|
| Steel scrap         | g | 4.06E+02 |  |
| Plastic wrap        | g | 9.49E+00 |  |
| Cardboard packaging | g | 1.03E+02 |  |
| Hydraulic fluid     | g | 1.55E+00 |  |



|            |   |          |
|------------|---|----------|
| Motor oil  | g | 2.27E-01 |
| Greases    | g | 4.13E-02 |
| Lubricants | g | 2.02E+01 |

**Table S8.** Inputs and outputs for the raw material production of 1 kg of wooden pallet built with kiln-dried southern yellow pine (modified from Alanya-Rosenbaum et al. [20]).

|                                                       | Unit  | Weighted average | Allocation (%) |
|-------------------------------------------------------|-------|------------------|----------------|
| <b>Outputs: Products/Coproducts</b>                   |       |                  |                |
| Wood board                                            | kg    | 1                | 82.3           |
| Sawdust                                               | kg    | 0.083            | 6.8            |
| Hogged material                                       | kg    | 0.052            | 4.3            |
| Wood chips                                            | kg    | 0.063            | 5.2            |
| Scrap wood                                            | kg    | 0.0006           | 0.05           |
| Shavings                                              | kg    | 0.016            | 1.35           |
| <b>Inputs: materials/fuels</b>                        |       |                  |                |
| Sawn lumber, softwood, planed, kiln dried, at planer, |       |                  |                |
| SE/m3/RNA                                             | m3    | 0.0023           |                |
| Greases                                               | g     | 2.92E+00         |                |
| Motor oil                                             | g     | 8.49E+00         |                |
| Hydraulic fluid                                       | g     | 1.78E+01         |                |
| Lubricating fluid                                     | g     | 1.18E+01         |                |
| Plastic wrapping                                      | g     | 7.47E+00         |                |
| Cardboard packaging                                   | g     | 5.62E+00         |                |
| Natural gas                                           | L     | 3.10E+02         |                |
| Diesel                                                | L     | 8.89E-01         |                |
| Gasoline                                              | L     | 9.04E-03         |                |
| Liquefied petroleum gas                               | L     | 4.07E-02         |                |
| Wood fuel                                             | OD kg | 2.30E-02         |                |
| Diesel, forklift                                      | L     | 2.75E-01         |                |

---

|                                              |     |          |
|----------------------------------------------|-----|----------|
| Diesel, truck                                | L   | 1.21E-01 |
| Gasoline, truck                              | L   | 1.23E-03 |
| Propane, forklift                            | L   | 8.72E-01 |
| <b>Inputs: electricity/heat</b>              |     |          |
| Electricity, at grid, SERC, 2010/kWh/RNA     | kWh | 0.004    |
| <b>Outputs: Waste/emissions to treatment</b> |     |          |
| Steel scrap                                  | g   | 4.91E+02 |
| Plastic wrap                                 | g   | 1.15E+01 |
| Cardboard packaging                          | g   | 1.25E+02 |
| Hydraulic fluid                              | g   | 1.87E+00 |
| Motor oil                                    | g   | 2.75E-01 |
| Greases                                      | g   | 4.99E-02 |
| Lubricants                                   | g   | 2.45E+01 |

---
